# Supplementary material for: Mycotransformation of Commercial Grade Cypermethrin Dispersion by Aspergillus terreus PDB-B Strain Isolated from Lake Sediments of Kulamangalam, Madurai
Source: MDPI journal article supplement (doi:10.3390/molecules29071446), 2024-03-23
Supplement: s1 [file s1]

**Supplementary Table S1.** Physicochemical parameters of the lake sediment samples used in the study

| <b>Parameter</b>            | <b>Unit</b> | <b>Value</b> | <b>Interpretation</b>    |
|-----------------------------|-------------|--------------|--------------------------|
| <b>Texture</b>              | -           | -            | clay loam                |
| <b>Calcareousness</b>       | -           | -            | Very high                |
| <b>pH</b>                   |             | 7.35         | neutral                  |
| <b>EC</b>                   | dS/m        | 1.87         | Critical for germination |
| <b>Available nitrogen</b>   | Kg/ha       | 106          | low                      |
| <b>Available phosphorus</b> | Kg/ha       | 59           | High                     |
| <b>Available potassium</b>  | Kg/ha       | 312          | High                     |
| <b>Organic carbon</b>       | g/Kg        | 6.46         | Medium                   |
| <b>Available iron</b>       | mg/L        | 12.10        | Sufficient               |
| <b>Available manganese</b>  | mg/L        | 16.67        | Sufficient               |
| <b>Available zinc</b>       | mg/L        | 0.85         | deficient                |
| <b>Available copper</b>     | mg/L        | 4.18         | sufficient               |
| <b>Total nitrogen</b>       | %           | 0.11         | -                        |

**Supplementary Table S3.** Screening results of the fungal strains for the production of different enzymes

| <b>Fungal strain</b> | <b>Protease</b> | <b>Caseinase</b> | <b>Cellulose</b> | <b>Urease</b> | <b>Esterase</b> | <b>β-glucosidase</b> |
|----------------------|-----------------|------------------|------------------|---------------|-----------------|----------------------|
| <b>A</b>             | -               | -                | -                | -             | -               | -                    |
| <b>B</b>             | -               | -                | -                | -             | -               | +                    |
| <b>C</b>             | -               | -                | -                | -             | -               | -                    |
| <b>D</b>             | -               | -                | -                | -             | -               | -                    |
| <b>H1</b>            | -               | -                | -                | -             | -               | -                    |
| <b>H2</b>            | -               | -                | -                | -             | -               | -                    |
| <b>H3</b>            | -               | -                | -                | -             | -               | +                    |
| <b>I</b>             | -               | -                | -                | -             | +               | +                    |
| <b>J</b>             | -               | -                | -                | -             | -               | -                    |
| <b>UN 2</b>          | -               | -                | -                | -             | -               | -                    |
| <b>UN 3</b>          | -               | -                | -                | -             | -               | +                    |
| <b>S+M 108</b>       | -               | -                | -                | -             | -               | -                    |
| <b>M3 101</b>        | -               | -                | -                | -             | -               | +                    |
| <b>M3 106</b>        | -               | -                | -                | +             | -               | -                    |
| <b>M3 107</b>        | -               | -                | -                | -             | -               | -                    |
| <b>M3 108</b>        | -               | -                | -                | +             | -               | +                    |

**Supplementary Table S4.** Screening results for the production of lignin-degrading enzymes

| <b>Fungal strain</b>     | <b>Bromophenol blue</b> | <b>Methylene blue</b> | <b>Phenol red</b> | <b>Staining lignin</b> | <b>Congo red</b> | <b>Guaiacol</b> | <b>Tannic acid</b> |
|--------------------------|-------------------------|-----------------------|-------------------|------------------------|------------------|-----------------|--------------------|
| <b>A</b>                 | -                       | -                     | -                 | +                      | +                | -               | +                  |
| <b>B</b>                 | -                       | +                     | -                 | +                      | -                | -               | +                  |
| <b>D</b>                 | +                       | -                     | -                 | +                      | -                | -               | +                  |
| <b>H</b>                 | +                       | +                     | -                 | +                      | -                | -               | -                  |
| <b>I</b>                 | +                       | -                     | +                 | +                      | +                | -               | +                  |
| <b>J</b>                 | +                       | -                     | -                 | +                      | +                | -               | -                  |
| <b>UN2</b>               | -                       | -                     | +                 | +                      | +                | -               | +                  |
| <b>UN3</b>               | +                       | -                     | -                 | +                      | +                | -               | -                  |
| <b>S+M10<sup>8</sup></b> | +                       | -                     | -                 | +                      | +                | -               | +                  |
| <b>M3 10<sup>1</sup></b> | -                       | +                     | +                 | +                      | -                | -               | +                  |
| <b>M3 10<sup>6</sup></b> | -                       | -                     | -                 | +                      | -                | +               | +                  |
| <b>M3 10<sup>7</sup></b> | -                       | -                     | -                 | -                      | -                | -               | +                  |
| <b>M3 10<sup>8</sup></b> | -                       | +                     | -                 | -                      | +                | -               | +                  |

**Supplementary Figure S1.** Presence and absence of clearance zones on Methylene blue agar plates by fungal isolates

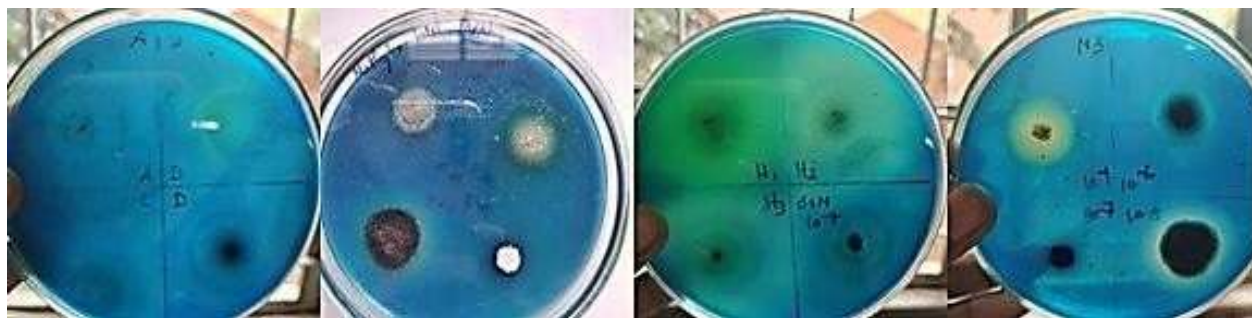

**Supplementary Figure S2.** Presence and absence of zone in Congo red plates by fungal isolates

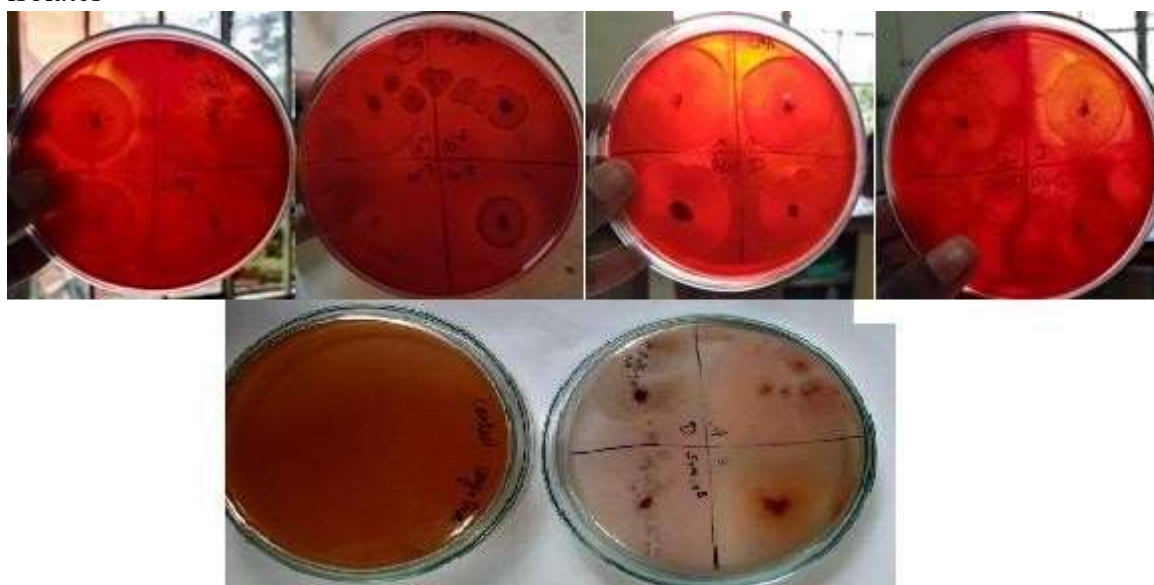

**Supplementary Figure S3.** Presence and absence of decolorization in Bromophenol blue plates by fungal isolates

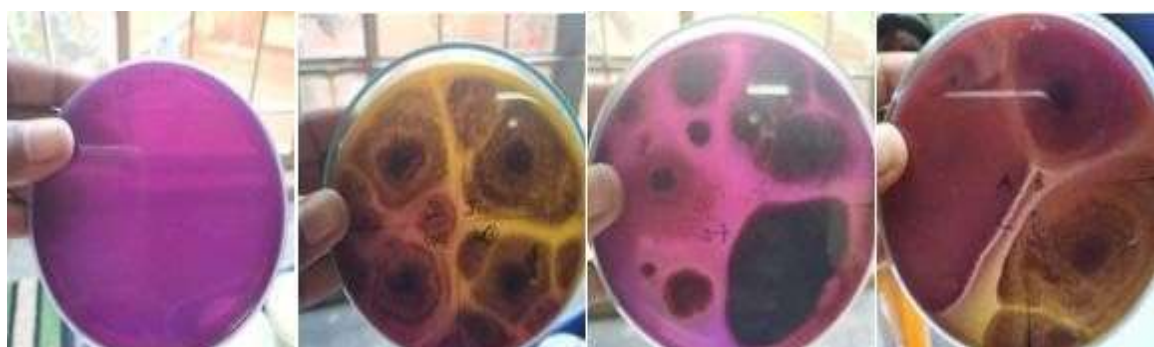

**Supplementary Figure S4.** Growth of fungal strains utilizing Tannic acid as sole carbon source in Mineral Salt Medium.

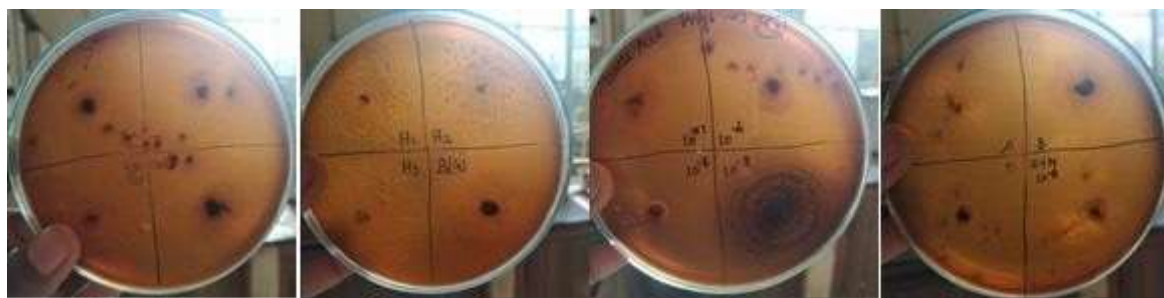

**Supplementary Figure S5** Growth of fungal strains utilizing Guaiacol as sole carbon source in Mineral Salt Medium

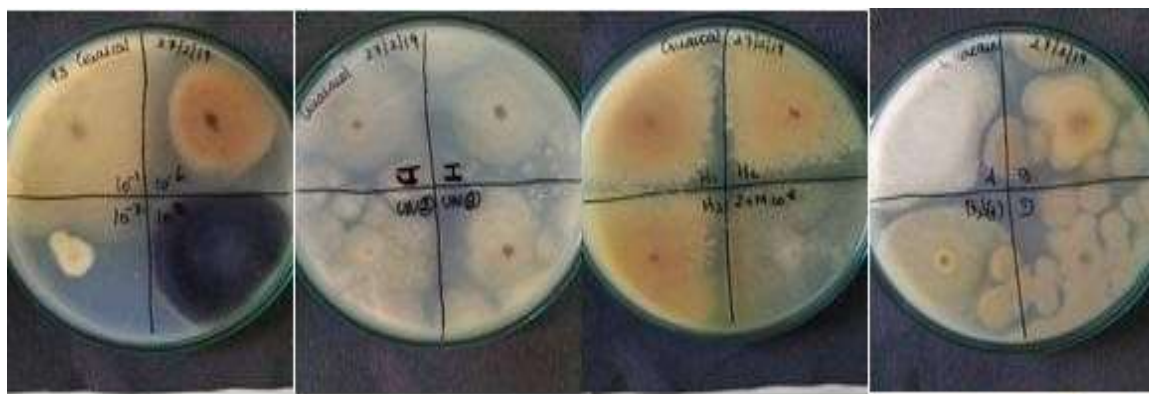



Supplementary Table S2 Colony morphology of fungal strains on PDA plates (obverse and reverse view) and microscopic view (40X)

| Fungal strain | Colony Morphology on PDA plate                                                     |                                                                                     | Spore arrangement                                                                    | Tentative identity                                   |
|---------------|------------------------------------------------------------------------------------|-------------------------------------------------------------------------------------|--------------------------------------------------------------------------------------|------------------------------------------------------|
|               | Obverse view                                                                       | Reverse view                                                                        |                                                                                      |                                                      |
| A             |   |   |   | <i>Eurotium herbariorum</i><br>( <i>A. glaucus</i> ) |
| B             |  |  |  | <i>Aspergillus terreus</i>                           |



|    |                                                                                    |                                                                                     |                                                                                      |                              |
|----|------------------------------------------------------------------------------------|-------------------------------------------------------------------------------------|--------------------------------------------------------------------------------------|------------------------------|
| C  |   |   |   | <i>Aspergillus fumigatus</i> |
| D2 |  |  |  | <i>Aspergillus niger</i>     |



|    |                                                                                    |                                                                                     |                                                                                      |                                                        |
|----|------------------------------------------------------------------------------------|-------------------------------------------------------------------------------------|--------------------------------------------------------------------------------------|--------------------------------------------------------|
| H1 |   |   |   | <i><b>Eurotium<br/>herbariorum<br/>(A.glaucus)</b></i> |
| H2 |  |  |  | <i><b>Eurotium<br/>herbariorum<br/>(A.glaucus)</b></i> |



|    |                                                                                    |                                                                                     |                                                                                      |                                                               |
|----|------------------------------------------------------------------------------------|-------------------------------------------------------------------------------------|--------------------------------------------------------------------------------------|---------------------------------------------------------------|
| H3 |   |   |   | <i>Eurotium<br/>herbariorum<br/>(A.glaucus)<br/>allomorph</i> |
| I  |  |  |  | <i>Aspergillusniger</i>                                       |

|    |                                                                                    |                                                                                     |                                                                                      |                            |
|----|------------------------------------------------------------------------------------|-------------------------------------------------------------------------------------|--------------------------------------------------------------------------------------|----------------------------|
| J  |   |   |   | <i>Aspergillusniger</i>    |
| M1 |  |  |  | <i>Aspergillus terreus</i> |



|    |                                                                                    |                                                                                     |                                                                                      |                                                                |
|----|------------------------------------------------------------------------------------|-------------------------------------------------------------------------------------|--------------------------------------------------------------------------------------|----------------------------------------------------------------|
| M6 |   |   |   | <i>Aspergillus</i><br>( <i>Emericella</i> )<br><i>nidulans</i> |
| M7 |  |  |  | <i>Trichoderma</i><br><i>viride</i>                            |



|       |                                                                                                                                                                                            |                                                                                                                                                                                               |                                                                                                                                                                                                                                           |                           |
|-------|--------------------------------------------------------------------------------------------------------------------------------------------------------------------------------------------|-----------------------------------------------------------------------------------------------------------------------------------------------------------------------------------------------|-------------------------------------------------------------------------------------------------------------------------------------------------------------------------------------------------------------------------------------------|---------------------------|
| M8    |  A petri dish containing a dark blue, fuzzy mold colony. The label 'M310-8' is visible in the background. |  A petri dish containing a light brown, fuzzy mold colony. The label 'M310-8' is visible in the background. |  A microscopic view showing several dark, oval-shaped spores on a light purple background.                                                             | NA                        |
| SM108 |  A petri dish containing a green, fuzzy mold colony. The label 'SM108' is visible in the background.     |  A petri dish containing a light brown, fuzzy mold colony. The label 'SM108' is visible in the background. |  A microscopic view showing a large, circular spore with a long, thin stalk, surrounded by many smaller spores, characteristic of Aspergillus flavus. | <i>Aspergillus flavus</i> |

|     |                                                                                    |                                                                                     |                                                                                      |                           |
|-----|------------------------------------------------------------------------------------|-------------------------------------------------------------------------------------|--------------------------------------------------------------------------------------|---------------------------|
| UN2 |   |   |   | <i>Aspergillus flavus</i> |
| UN3 |  |  |  | <i>Aspergillus niger</i>  |
